# Supplementary material
Source: HighWire-hosted journal article supplement (https://www.cmajopen.ca/highwire/filestream/81028/field_highwire_adjunct_files/0/open-2016-0115-1-at.pdf)
Supplement: open-2016-0115-1-at.pdf [file open-2016-0115-1-at.pdf]

## Appendix 1 (as supplied by the authors): Survey Instrument

### Relevant questions used from the Canadian Community Health Survey<sup>1</sup> - Injury Module

---

|                                       |                                                                                          |
|---------------------------------------|------------------------------------------------------------------------------------------|
| <b>Variable Name</b>                  | INJ_01                                                                                   |
| <b>Question</b>                       | In the past 12 months, that is, from (date one year ago) to yesterday, were you injured? |
| <b>Responses</b>                      |                                                                                          |
| YES                                   | 1                                                                                        |
| NO                                    | 2                                                                                        |
| DON'T KNOW                            | 7                                                                                        |
| REFUSAL                               | 8                                                                                        |
| <b>Variable Name</b>                  | INJ_02                                                                                   |
| <b>Question</b>                       | How many times were you injured?                                                         |
| <b>Responses</b>                      |                                                                                          |
| NUMBER OF TIMES                       | 1 - 30                                                                                   |
| NOT APPLICABLE                        | 96                                                                                       |
| DON'T KNOW                            | 97                                                                                       |
| NOT STATED                            | 98                                                                                       |
| <b>Variable Name</b>                  | INJ_03                                                                                   |
| <b>Question</b>                       | Thinking about the most serious injury, in which month did it happen?                    |
| <b>Responses</b>                      |                                                                                          |
| JANUARY                               | 1                                                                                        |
| FEBRUARY                              | 2                                                                                        |
| MARCH                                 | 3                                                                                        |
| APRIL                                 | 4                                                                                        |
| MAY                                   | 5                                                                                        |
| JUNE                                  | 6                                                                                        |
| JULY                                  | 7                                                                                        |
| AUGUST                                | 8                                                                                        |
| SEPTEMBER                             | 9                                                                                        |
| OCTOBER                               | 10                                                                                       |
| NOVEMBER                              | 11                                                                                       |
| DECEMBER                              | 12                                                                                       |
| NOT APPLICABLE                        | 96                                                                                       |
| DON'T KNOW                            | 97                                                                                       |
| REFUSAL                               | 98                                                                                       |
| NOT STATED                            | 99                                                                                       |
| <b>Variable Name</b>                  | INJ_05                                                                                   |
| <b>Question</b>                       | What type of injury did you have? For example, a broken bone or burn.                    |
| <b>Responses</b>                      |                                                                                          |
| MULTIPLE INJURIES (EXC. MINOR INJ.)   | 1                                                                                        |
| BROKEN OR FRACTURED BONES             | 2                                                                                        |
| BURN, SCALD, CHEMICAL BURN            | 3                                                                                        |
| DISLOCATION                           | 4                                                                                        |
| SPRAIN OR STRAIN (INCL. TORN LIG.)    | 5                                                                                        |
| CUT, PUNCTURE, ANIMAL BITE            | 6                                                                                        |
| SCRAPE(S), BRUISE(S), BLISTER(S)      | 7                                                                                        |
| CONCUSSION OR OTHER BRAIN INJURY      | 8                                                                                        |
| POISONING(EXC. FOOD POIS, POISON IVY) | 9                                                                                        |
| INJURY TO INTERNAL ORGANS             | 10                                                                                       |
| OTHER                                 | 11                                                                                       |
| NOT APPLICABLE                        | 96                                                                                       |
| DON'T KNOW                            | 97                                                                                       |
| REFUSAL                               | 98                                                                                       |
| NOT STATED                            | 99                                                                                       |

| Variable Name                         | INJ_08                                                                                                     |
|---------------------------------------|------------------------------------------------------------------------------------------------------------|
| <b>Question</b>                       | Where were you when you were injured? For example, someone's house, an office building, construction site. |
| <b>Responses</b>                      |                                                                                                            |
| IN A HOME OR ITS SURROUNDING AREA     | 1                                                                                                          |
| RESIDENTIAL INSTITUTION               | 2                                                                                                          |
| SCHOOL, COLLEGE, UNIVERSITY           | 3                                                                                                          |
| SPORTS OR ATHLECTICS AREA OF SCHOOL   | 4                                                                                                          |
| OTHER SPORTS OR ATHLETICS AREAS       | 5                                                                                                          |
| OTHER INSTITUTION                     | 6                                                                                                          |
| STREET, HIGHWAY, SIDEWALK             | 7                                                                                                          |
| COMMERCIAL AREA                       | 8                                                                                                          |
| INDUSTRIAL OR CONSTRUCTION AREA       | 9                                                                                                          |
| FARM                                  | 10                                                                                                         |
| COUNTRYSIDE, FOREST, LAKE, OCEAN, ... | 11                                                                                                         |
| OTHER                                 | 12                                                                                                         |
| NOT APPLICABLE                        | 96                                                                                                         |
| DON'T KNOW                            | 97                                                                                                         |
| REFUSAL                               | 98                                                                                                         |
| NOT STATED                            | 99                                                                                                         |

| Variable Name                            | INJ_09                                     |
|------------------------------------------|--------------------------------------------|
| <b>Question</b>                          | What were you doing when you were injured? |
| <b>Responses</b>                         |                                            |
| SPORTS OR PHYSICAL EXERCISE              |                                            |
| LEISURE OR HOBBY                         |                                            |
| WORKING AT A JOB OR BUSINESS             |                                            |
| HOUSEHOLD CHORES, OTHER UNPAID WORK      |                                            |
| SLEEPING, EATING, PERSONAL CARE          |                                            |
| GOING UP AND DOWN STAIRS                 |                                            |
| DRIVER OR PASSENGER IN/ON ROAD MOTOR VE. |                                            |
| DRIVER OR PASSENGER IN/ON OFF-R. MOTOR V |                                            |
| WALKING                                  |                                            |
| OTHER                                    |                                            |
| NOT APPLICABLE                           |                                            |
| DON'T KNOW                               |                                            |
| REFUSAL                                  |                                            |
| NOT STATED                               |                                            |

| Variable Name    | INJ_10                               |
|------------------|--------------------------------------|
| <b>Question</b>  | Was the injury the result of a fall? |
| <b>Responses</b> |                                      |
| YES              | 1                                    |
| NO               | 2                                    |
| NOT APPLICABLE   | 6                                    |
| DON'T KNOW       | 7                                    |
| REFUSAL          | 8                                    |
| NOT STATED       |                                      |

| Variable Name                           | INJDCAU                              |
|-----------------------------------------|--------------------------------------|
| <b>Question Name</b>                    | Cause of injury - (Derived variable) |
| <b>Responses</b>                        |                                      |
| FALL                                    | 1                                    |
| TRANSPORTATION ACCIDENT                 | 2                                    |
| BUMPED, PUSHED, BITTEN                  | 3                                    |
| STRUCK OR CRUSHED BY OBJECT(S)          | 4                                    |
| CONTACT W/SHARP OBJECT, TOOL OR MACHINE | 5                                    |

|                                        |    |
|----------------------------------------|----|
| SMOKE, FIRE, FLAMES                    | 6  |
| CONTACT W/HOT OBJECT, LIQUID OR GAS    | 7  |
| EXTREME WEATHER OR NATURAL<br>DISASTER | 8  |
| OVEREXERTION OR STRENUOUS<br>MOVEMENT  | 9  |
| PHYSICAL ASSAULT                       | 10 |
| OTHER                                  | 11 |
| NOT APPLICABLE                         | 98 |
| NOT STATED                             | 99 |

---

**References:**

1. Statistics Canada. Canadian Community Health Survey, Annual Component – 2014.
